# Supplementary material for: Electrochemical behaviors and simultaneous determination of guanine and adenine based on highly ordered Pd-nanowire arrays-modified glassy carbon electrode
Source: Royal Society of Chemistry journal article supplement (doi:10.1039/c5ay00608b), 2015-01-01
Supplement: c5ay00608b1.pdf [file c5ay00608b1.pdf]

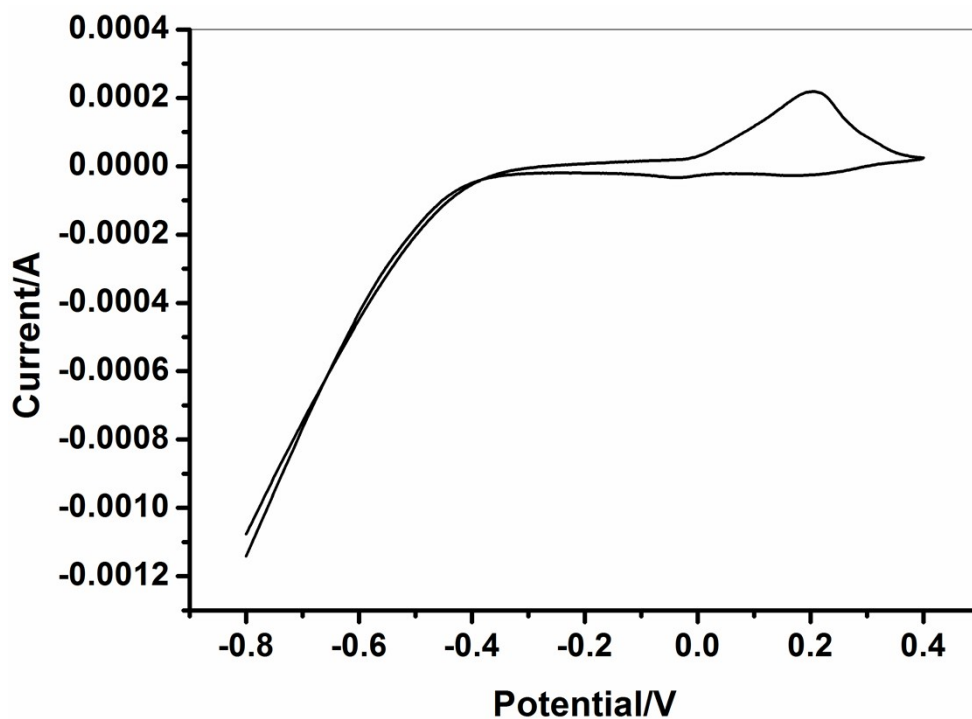

Fig.S1 CV of Pd NWAs modified electrode in 0.5 M H<sub>2</sub>SO<sub>4</sub>, Scan rate: 50 mV s<sup>-1</sup>

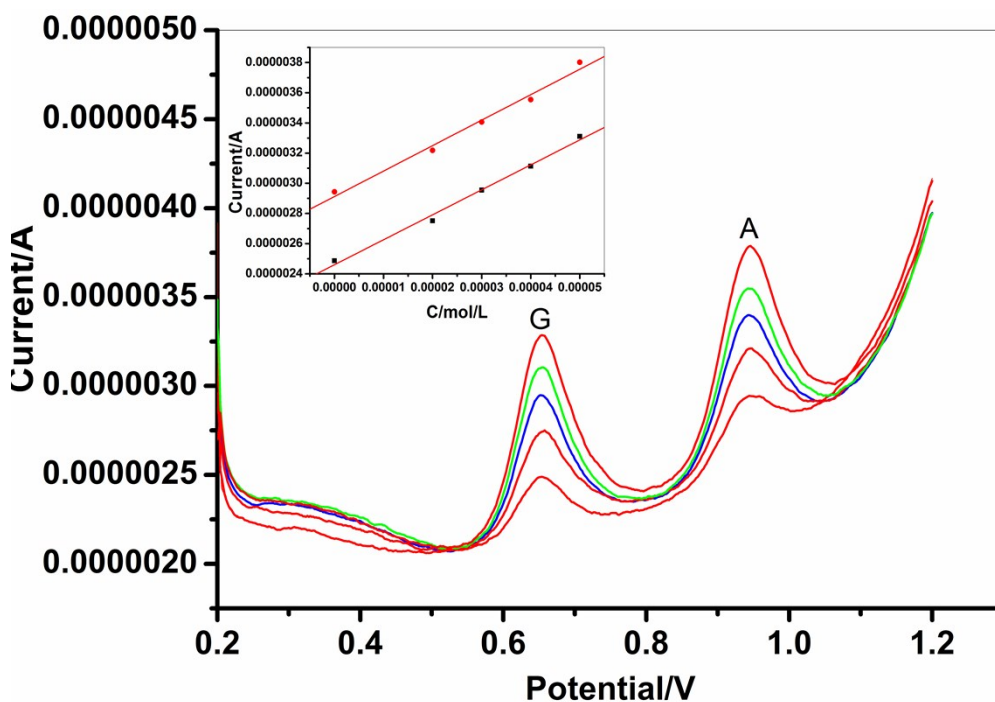

Fig. S2 DPV response of PdNWs modified electrode for the detection of G and A in fish sperm DNA sample ss-DNA sample in pH 7.1 PB solution. Inset: Plot of anodic peak currents of adenine(A) and guanine(G) versus the concentration of A and G. Concentrations from inner to outer of curves: G (0, 20, 30, 40, 50  $\mu$ M), A (0, 20, 30, 40, 50  $\mu$ M).
